# Supplementary material
Source: PubMed Central journal article supplement (PMC3443617)

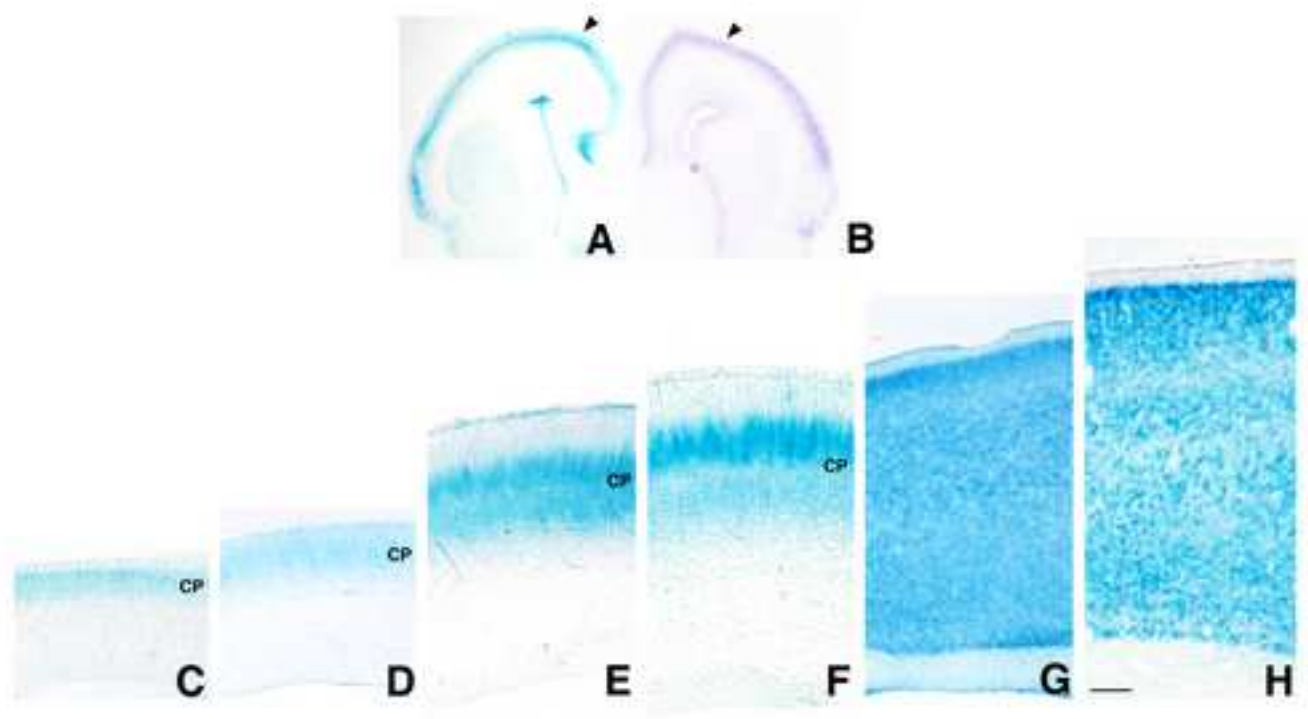

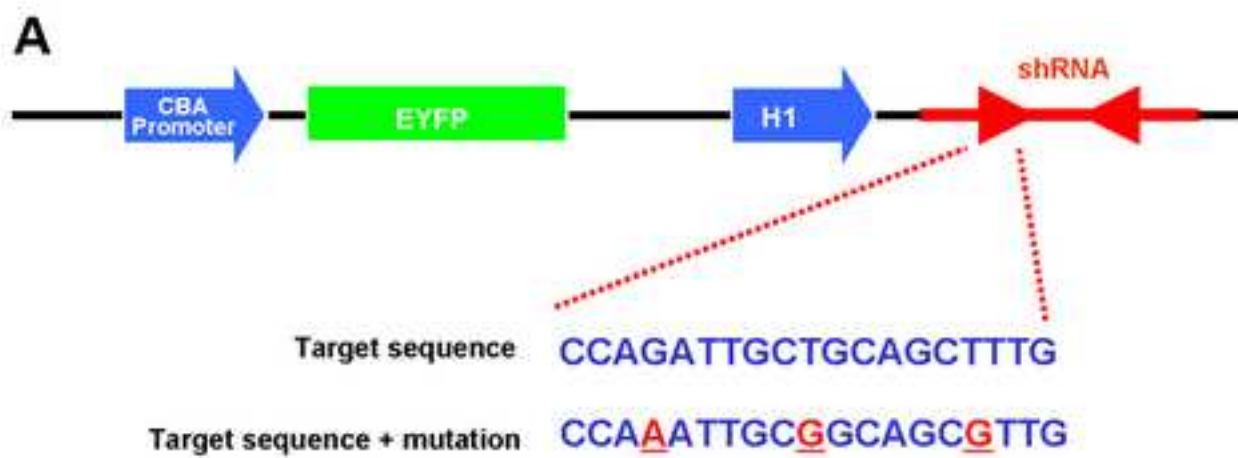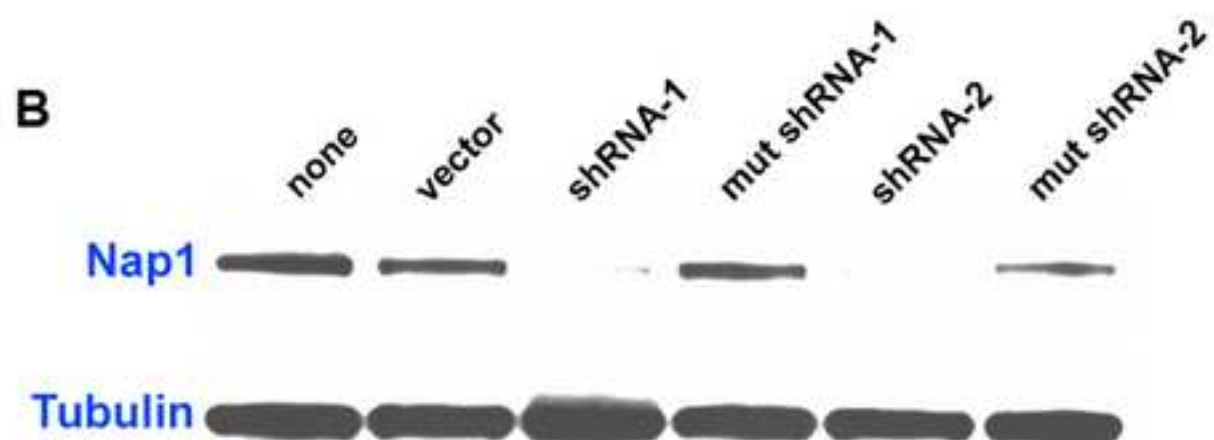

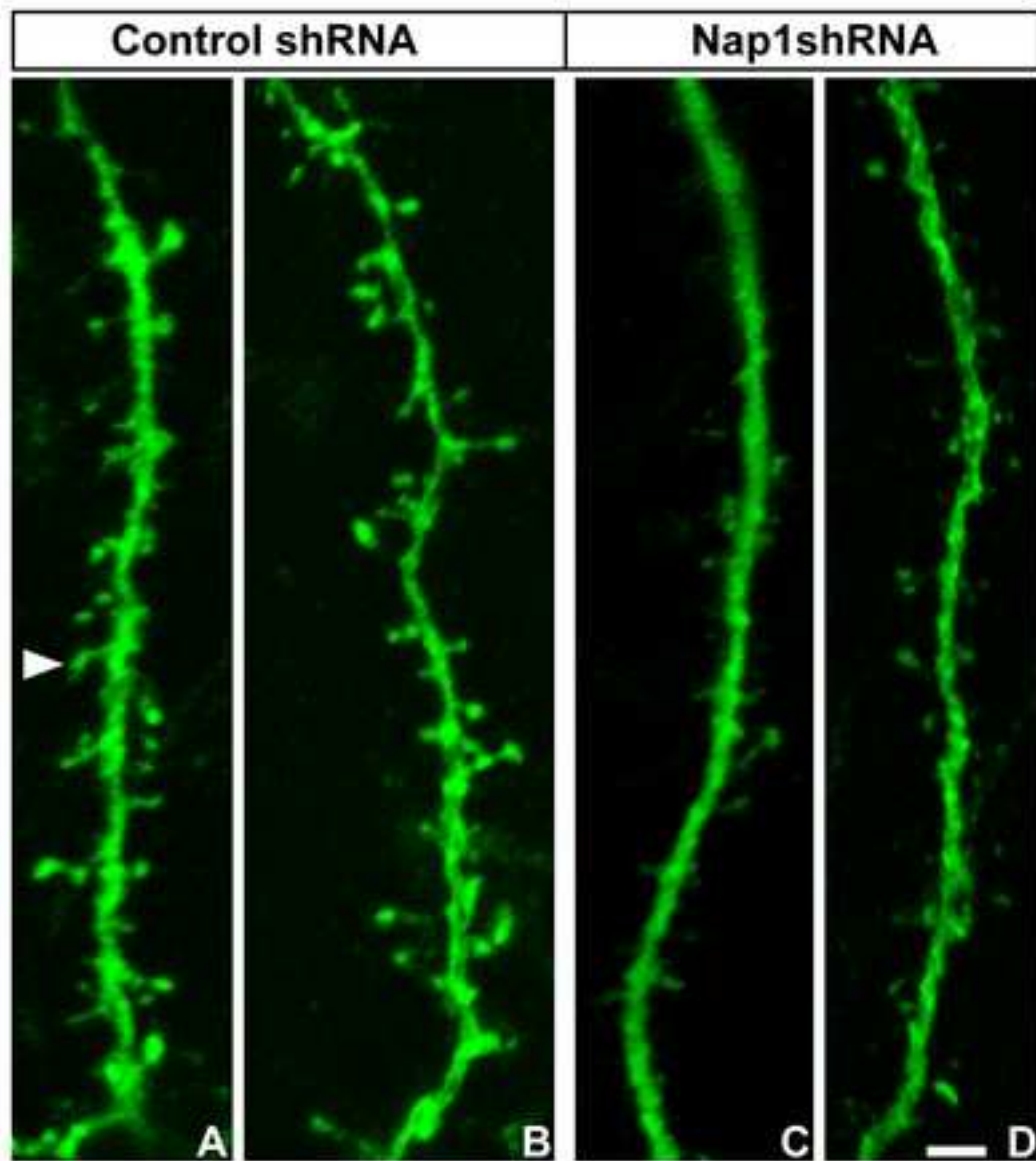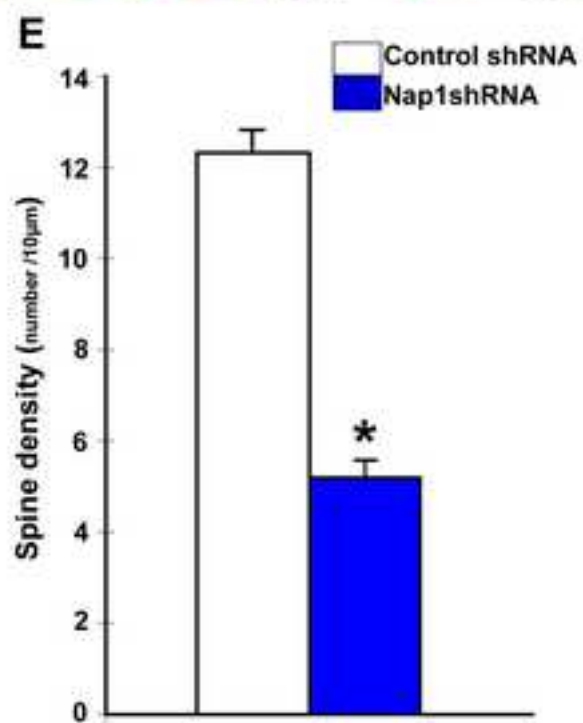

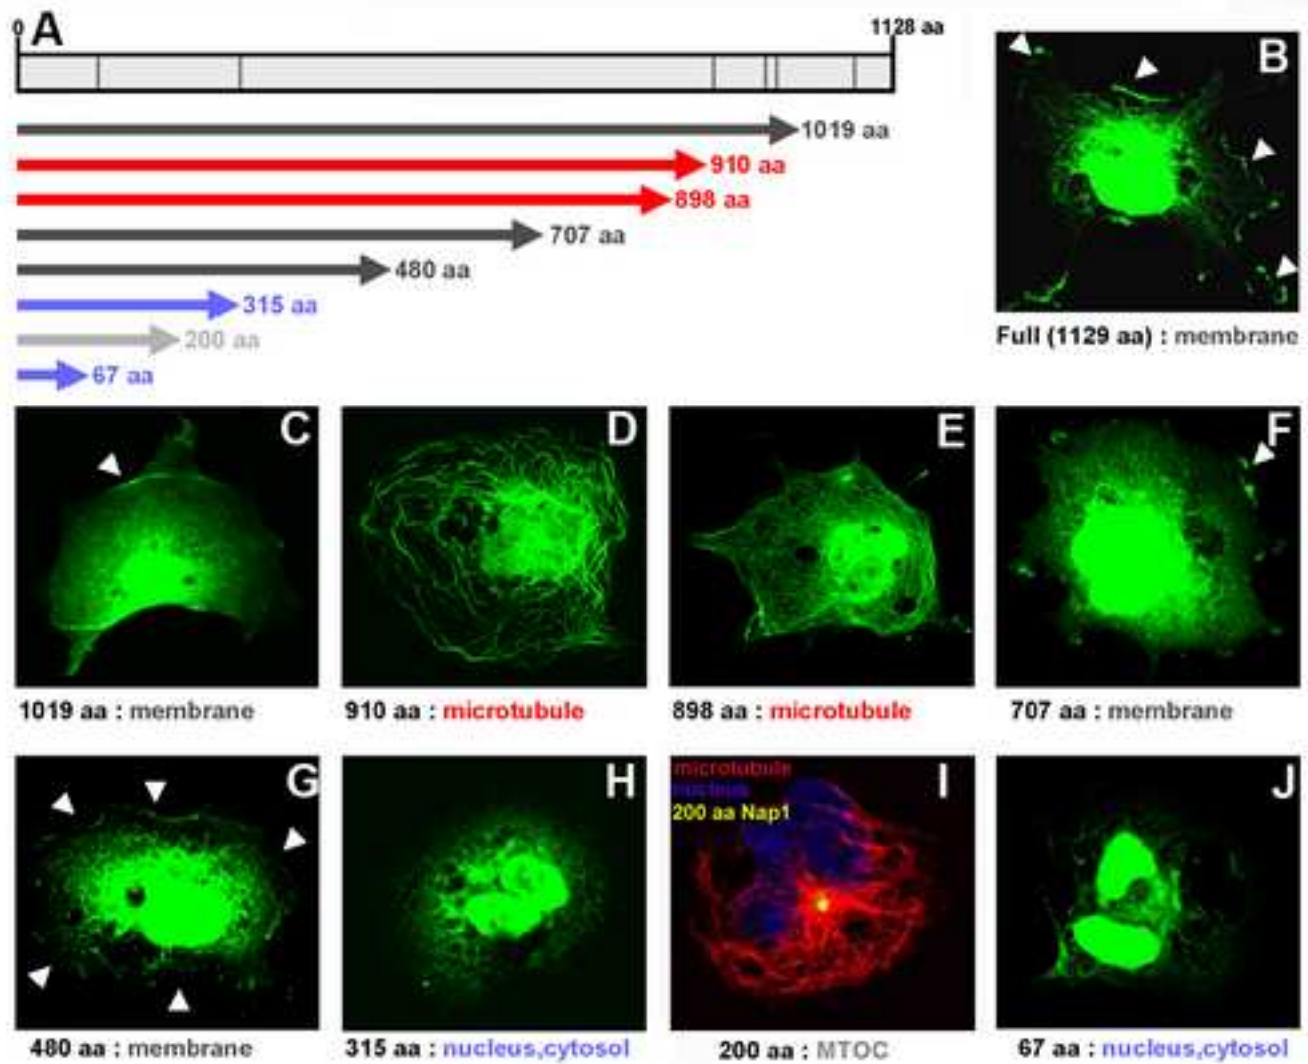

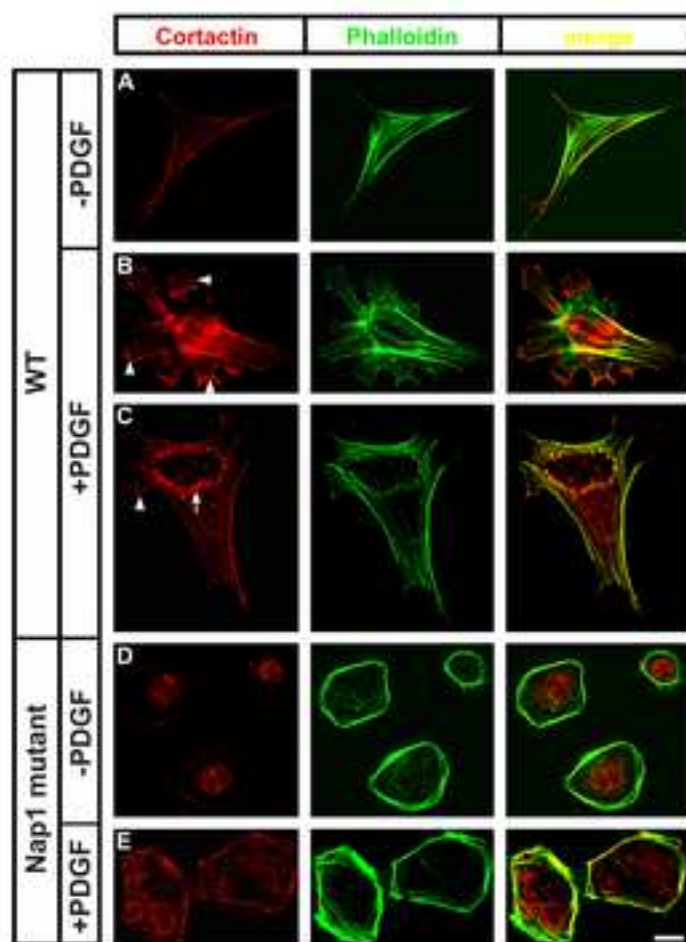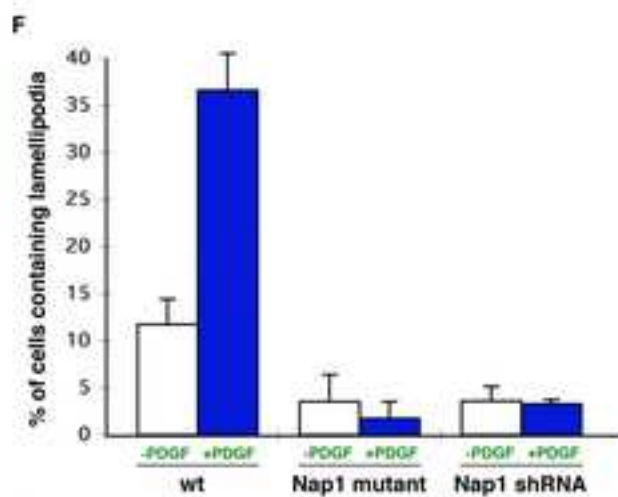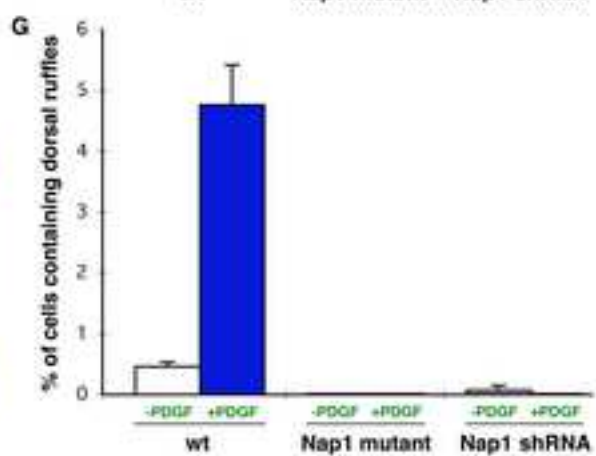

Supplement: NIHMS22813-supplement-01.pdf [file NIHMS22813-supplement-01.pdf]
